## *I N F U T U R E I S S U E S*

The Value of Quantitative Electroencephalography in Clinical Psychiatry:  
A Report by the Committee on Research of the American Neuropsychiatric Association

*Kerry L. Coburn, Ph.D., Edward C. Lauterbach, M.D., Nash N. Boutros, M.D.,  
Kevin J. Black, M.D., David B. Arciniegas, M.D., C. Edward Coffey, M.D.*

Internal Capsule Size in Good and Poor Outcome Schizophrenia

*Adam M. Brickman, Ph.D., Monte S. Buchsbaum, M.D., Zlatin Ivanov, M.D., Joan C. Borod,  
Nancy S. Foldi, Ph.D., Eunice Hahn, M.D., Serge A. Mitelman, M.D., Erin A. Hazlett, Ph.D.,  
Samantha J. Lincoln, M.D., Randall E. Newmark, M.D., Lina Shihabuddin, M.D.*

Abnormalities in Motor Physiology in Bipolar Disorder

*James B. Lohr, M.D., Michael P. Caligiuri, Ph.D.*

Obsessive-Compulsive Symptoms in Adults With Non-Active Rheumatic Fever

*Pedro G. Alvarenga, M.D., Ana G. Hounie, Ph.D., Marcos T. Mercadante, Ph.D., Ph.D.,  
Juliana B. Diniz, Guilherme Spina, M.D., Marcos Salem, M.D., Euripedes C. Miguel, Ph.D.*

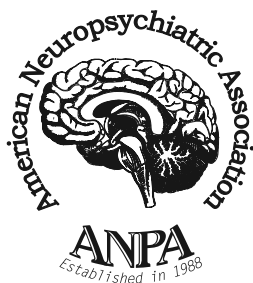

## American Neuropsychiatric Association Fellows and Awards

### **Fellows of the American Neuropsychiatric Association**

In 1999 the designation of Fellow of the American Neuropsychiatric Association was established in recognition of special achievement in neuropsychiatry, behavioral neurology, neuropsychology or the clinical neurosciences. Individuals elected as Fellows of ANPA in 2006 are:

Kevin J. Black, M.D.  
Allen J. Rubin, M.D.

### **Career Development Award**

In 2001 the ANPA Career Development Award Program was instituted. It recognizes an advanced trainee in psychiatry, neurology, or neuropsychology whose accomplishments during training offer promise of a successful career in neuropsychiatry and the clinical neurosciences. The 2006 awardee is:

Valerie Voon, M.D.

### **Young Investigator Award**

The Young Investigator Awards are given to several young investigators who are embarking on promising careers in the clinical neurosciences. These young investigators are chosen from among the abstract presenters at the ANPA Annual Meeting. The 2006 winners of the Young Investigator Award are:

Mollie R. Gordon, M.D.  
Roger J. Jou, M.D.  
Eliot A. Licht, M.D.  
Evan D. Murray, M.D.  
Anthony C. Ruocco, M.D.

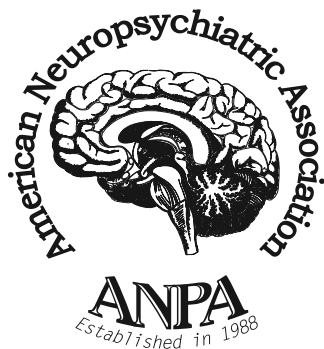

18th Annual Meeting

**American Neuropsychiatric Association**

**February 17 – 20, 2007**

**Hilton Tucson El Conquistador Golf & Tennis Resort  
Tucson, Arizona**

Jointly Sponsored by:

The Ohio State University Medical Center

American Neuropsychiatric Association

With special participation of the International Neuropsychological Society  
and the Society for Behavioral and Cognitive Neurology

## Call for Abstracts

We are pleased to announce the 18th Annual Meeting of the American Neuropsychiatric Association to be held in Tucson, Arizona, February 17 - 20, 2007 at the Hilton Tucson El Conquistador Golf & Tennis Resort. This year's meeting will include a Keynote address and four scientific sessions, each with several prominent speakers.

### Program will include:

- **Presidential Symposium on Developments in Behavioral Neuroanatomy**
- **Sessions will include:**
  - Sociobiological Bases for Aggression**
  - Neural Correlates of Meditation, Compassion and Religious Experience**
  - Brain Stimulation in the Treatment of Neuropsychiatric Disease**
- **New for 2007: Hot Topics in Research Platform Presentations**

### Abstract Submission

The meeting will include Poster Sessions offering an opportunity to present new research and to discuss the work of others. We invite you to submit an abstract of your research to be presented during these sessions. Travel awards will be given to several of the young investigators who are embarking on promising careers in the clinical neurosciences. The ANPA Scientific Program Committee will review all abstracts, and decisions regarding acceptance will be e-mailed in November.

**Online submission is available at: [appi.manuscriptcentral.com](http://appi.manuscriptcentral.com)**

The deadline for the receipt of abstracts submitted on-line is October 20, 2006. Accepted abstracts will be published in the spring 2007 issue of the *Journal of Neuropsychiatry and Clinical Neurosciences* (JNP), the official journal of ANPA. JNP is supporting our abstract submissions through their online manuscript submission process. **Please note that by submitting an abstract, the investigator agrees to attend the meeting and present the poster or to designate an alternate presenter who will attend the meeting.**

### Abstract Submission Instructions and Requirements

Abstracts must:

- Have relevance for neuropsychiatry, behavioral/cognitive neurology, or the clinical neurosciences.
- Represent work not previously published or presented.
- Be 250 words or fewer (not including title, authors, and affiliations).
- Be clearly and concisely written and contain sufficient information to allow the review committee to assess the research being presented.

Include affiliation for principal or first author only. The e-mail address listed in the submission will be used for all communication. Be sure to list all authors in the abstract. All external sources of support and possible conflicts of interest must be listed and included with the submission.

## Format

Strict adherence to the formatting listed below for either Original Work or a Case Report is required. Please type your title as follows: The first letter of each word is capitalized, except for the first letter of each preposition or conjunction. Scientific words can be entered in mixed case (e.g. fMRI). Example: Relationship between Fatigue and Neuropsychological Performance in HIV Infection. Tables, photographs, figures, or references may not be included. All submissions must be in a Word or text document.

### Format for Original Work

**Background:** A succinct summary of the literature or theoretical rationale underlying the abstract.

Example: HIV-Associated Dementia (or AIDS Dementia Complex) is thought to represent a subcortical dementia with...

**Objective:** This section should provide the basic rationale for the research and the hypothesis tested.

**Methods:** This section must include the number of subjects and information about the experimental design.

Example: Subjects included 20 HIV-seropositive male outpatients who met criteria for HIV-Associated Dementia. All subjects received...

**Results:** This section should include the statistical approach and details of the analysis (including statistical or experimental controls) that support the conclusions. Statements such as “results will be discussed” or “data will be presented” are not acceptable.

Example: Apathy measures were significantly correlated with basal ganglia hypoperfusion. This is in contrast to...

**Conclusion:** This section should summarize the essential findings and their implications

Example: Apathy, but not syndromal depression, is associated with subcortical impairments in...

### Format for Case Report

Background: A succinct summary of the literature or theoretical rationale underlying the abstract.

Case History

Conclusions: This section should summarize the essential findings and their implications

Abstracts will be reviewed by the ANPA Program Committee. The decision of the Committee is final.

### Instructions for On-line Submission

1. Go to: [appi.manuscriptcentral.com](http://appi.manuscriptcentral.com)
2. Click on “Check for existing account.” Follow instructions to avoid duplicate accounts
3. Select the Journal of Neuropsychiatry and Clinical Neurosciences
4. Log in: the first step is to create an account. You do this by clicking on the “Create an Account” link on the left side bar menu. Please fill in all fields accurately. All bolded fields are required. If a required field does not apply to you, please enter “none” in the space provided. When you are finished, press the “Submit Information” button to continue with your submission
5. In the Main Menu click on “Author Center”
6. Click the “Submit First Draft of a New Manuscript”
  - Screen 1: Complete screen. Under “type of manuscript” choose: ANPA Annual Meeting Abstract. Under “subtype” please indicate the one topic into which your abstracts best fits. Your choices are: Basic Neuroscience, Dementia, Epilepsy, General Clinical Neuropsychiatry, Imaging, Neuropsychology, Schizophrenia, Traumatic Brain Injury, Pediatric Neuropsychiatry/Neuropsychology

- Complete screens 2 through 4
- Screen 5: Enter Poster Presentation in box labeled “abstract”
- Skip screens 6 through 8
- Screen 9: Conflict of Interest Disclosure and Young Investigator Award. All external sources of support and possible conflicts of interest must be listed in the “Comments to Journal Administrator”. If you wish to be considered for the Young Investigator Award state your intent in the “Comments to Journal Administrator” box. Submit application information as described below.
- Skip screen 10
- Complete screens 11 and 12

If you are unable to submit your abstract on-line contact the ANPA office by e-mail: [anpa@osu.edu](mailto:anpa@osu.edu) or by telephone: 614-447-2077.

**On line submission deadline is:                   October 20, 2006**  
 Hard copy/disk submission deadline is:       October 1, 2006

**Notifications of acceptance / rejection will be e-mailed in November**

**Please register for the meeting when you submit your abstract. On-line registration: [www.anpaonline.org](http://www.anpaonline.org)**

### **Young Investigator Awards**

Travel awards will be given to several young investigators who are embarking on promising careers in the clinical neurosciences. These young investigators will be chosen from among the abstract presenters. To qualify for the Young Investigator Award, the applicant must have performed the work described in the abstract while in training. The applicant’s training director must provide a letter confirming that the work was performed during training. We do not request letters of reference. The investigator must also provide a curriculum vitae and a statement of between 250 and 1000 words. The statement should describe the submitter’s role in the research; training background; interest in neuropsychiatry, behavioral and cognitive neurology, or the clinical neurosciences; and plans for his or her career. The Scientific Program Committee will choose recipients based on the quality of the abstract and, more broadly, the candidate’s perceived ability to make a contribution to the field with the encouragement and support provided by the award. Applicants for the Young Investigator Award, like others who submit abstracts, are agreeing to present the work if the abstract is accepted, regardless of whether a Young Investigator Award is granted. Award winners must attend the entire meeting. The Committee’s decision is final.

**To apply:**           During online submission, on screen 9 “Comments to Journal Administrator” state that you wish to be considered for the Young Investigator Award. Submit the information listed above to ANPA, 700 Ackerman Road, Suite 625, Columbus, OH 43202. The deadline for receipt of all application materials is October 20, 2006.

For more information on abstract submission, the Young Investigator Award, or registration, contact the ANPA office:

American Neuropsychiatric Association  
 700 Ackerman Road, Suite 625  
 Columbus, Ohio 43202  
 Phone: 614-447-2077   E-mail: [anpa@osu.edu](mailto:anpa@osu.edu)

Web Site: [www.anpaonline.org](http://www.anpaonline.org)

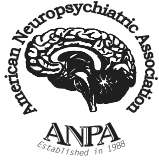

# American Neuropsychiatric Association

## ABOUT ANPA

The American Neuropsychiatric Association (ANPA), established in 1988, is an organization of professionals in neuropsychiatry and the clinical neurosciences. Our mission is to apply neuroscience for the benefit of people. We work together in a collegial fashion to advance knowledge of brain-behavior relations, provide a forum for learning, and promote excellent, scientific and compassionate care.

The strength of the organization is our diversity of membership, which is comprised of professionals in neuropsychiatry, behavioral neurology, neuropsychology, neuroradiology, neuropathology, and neurosurgery as well as the basic neurosciences, who share clinical and/or academic interests in neuropsychiatry. The interdisciplinary nature of the membership encourages collaborations among educators, clinicians, researchers, students and trainees in research presentations, symposia, workshops and/or continuing education courses. Students, fellows and other trainees are encouraged to participate and are offered discount membership and conference fees. The *Journal of Neuropsychiatry and Clinical Neurosciences (JNP)* is the official publication of the organization, and is a benefit of membership.

ANPA holds its annual scientific meeting in the early spring, and provides up to 30 CME / CE credits. Joint meetings with the International Neuropsychological Society, the British Neuropsychiatry Association, and the International Neuropsychiatry Congresses have added an international dimension to the ANPA conferences. Members are encouraged to submit their work for presentation at these annual meetings. Travel awards are available for promising young investigators. Annual meeting abstracts and proceedings are published in *JNP*.

In 1999 the designation of Fellow of the American Neuropsychiatric Association was established in recognition of special achievement in neuropsychiatry, behavioral neurology, neuropsychology or the clinical neurosciences.

In 2001 the ANPA Career Development Award Program was instituted. It recognizes advanced trainees in psychiatry, neurology, or neuropsychology whose accomplishments during training offer promise of a successful career in neuropsychiatry and the clinical neurosciences. The award will support costs associated with participation in two consecutive Annual Meetings, establish an informal mentoring relationship between the awardee and one ANPA Fellow and facilitate the awardee's involvement in ANPA.

ANPA has been actively engaged in efforts toward creation of subspecialty certification for neuropsychiatry including developing a core curriculum and guidelines for training in neuropsychiatry. In March 2004, a joint application from ANPA and the Society for Behavioral and Cognitive Neurology (SBCN) was submitted to the Unified Council for Neurologic Subspecialties (UCNS) for recognition of the Neurological Subspecialty Area (NSA) of Behavioral Neurology & Neuropsychiatry ([www.ucns.org](http://www.ucns.org)). On June 30, 2004 Behavioral Neurology & Neuropsychiatry was approved as a single subspecialty. The first certification exam in Behavioral Neurology & Neuropsychiatry will be offered in September 2006.

## BENEFITS OF MEMBERSHIP

- **Subscription** to the *Journal of Neuropsychiatry and Clinical Neurosciences (JNP)*
- **Online journal** subscriptions at a reduced price
- **Opportunities** for presentation at the annual meeting with accepted abstracts published in the *JNP*
- Significantly **reduced registration fees** at the annual meeting
- Regular **mailings** including newsletters, information about job opportunities and pertinent information about upcoming meetings
- **Discounted membership fees** for trainees
- **Collaboration** in clinical, educational and research activities and the opportunity to interact with senior colleagues
- Extensive **Bibliography** in Neuropsychiatry
- **Reduced journal subscription rates** from related organizations

## ANPA COMMITTEES

**The Education Committee** The ANPA Education Committee supports efforts related to education and practice of high quality care and research in neuropsychiatry. They have developed a model curriculum and standards for accreditation of neuropsychiatry fellowship programs. The committee has developed and maintains an updated bibliography of neuropsychiatry-relevant references.

**The Membership Committee** recruits new members for ANPA, reviews applications of all potential members, oversees collection of yearly membership dues, reviews Fellow applications and hosts a new member events at the annual ANPA meeting.

**The Research Committee** reviews and publishes articles on research issues in neuropsychiatry. They have developed a Research Registry that can be accessed through the ANPA website. Past projects include position statements on the clinician-scientist in neuropsychiatry, and topical reviews.

**The Scientific Program Committee** plans the ANPA Annual Meeting.

**The Website Committee** The ANPA website is located at [www.anpaonline.org](http://www.anpaonline.org).

### JOIN ANPA NOW!

**You can now join online at: [www.anpaonline.org](http://www.anpaonline.org)**

Candidates should have an interest in the field of clinical neuroscience.

Online: Go to [www.anpaonline.org](http://www.anpaonline.org)

Mail: Please send your application, CV and payment to:  
ANPA, 700 Ackerman Rd., Ste 625, Columbus, OH 43202

#### More information

Website: [www.anpaonline.org](http://www.anpaonline.org)

Email: [anpa@osu.edu](mailto:anpa@osu.edu)

Phone: 614-447-2077

**American Neuropsychiatric Association**  
 Application for Membership – (Please Print or Type)  
**You can now join online at: [www.anpaonline.org](http://www.anpaonline.org)**

Name: \_\_\_\_\_  MD    PhD    DO    Other

Work Address: \_\_\_\_\_ Home Address: \_\_\_\_\_

\_\_\_\_\_

Home Phone: \_\_\_\_\_

Work Phone: \_\_\_\_\_ Send mail to:    Work    Home

Fax: \_\_\_\_\_  Include my contact information in the online directory:

Note: The online directory is only accessible to ANPA members.

E-mail: \_\_\_\_\_

Date of Birth: \_\_\_\_\_  Include my contact information in the public online directory:

Note: The information available in the public directory includes name, title, institution, city, state, phone, and orientation of practice.

**Orientation of Practice** (check the one box that best describes your professional work)

- |                                               |                                     |                                       |                                         |                                   |
|-----------------------------------------------|-------------------------------------|---------------------------------------|-----------------------------------------|-----------------------------------|
| <input type="checkbox"/> Neuropsychiatry      | <input type="checkbox"/> Psychiatry | <input type="checkbox"/> Neuroscience | <input type="checkbox"/> Neurosurgery   | <input type="checkbox"/> Research |
| <input type="checkbox"/> Neuropsychology      | <input type="checkbox"/> Neurology  | <input type="checkbox"/> Geriatrics   | <input type="checkbox"/> Neuroradiology | <input type="checkbox"/> Other    |
| <input type="checkbox"/> Behavioral Neurology | <input type="checkbox"/> Psychology | <input type="checkbox"/> Pediatrics   | <input type="checkbox"/> Neuropathology |                                   |

**Research**

Please go to the ANPA website and add your research interests. Website address: [www.anpaonline.org](http://www.anpaonline.org)

**Education & Professional Training**

|                       |     |        |
|-----------------------|-----|--------|
| Undergraduate School  | Yr. | Degree |
| Professional School   | Yr. | Degree |
| Postgraduate Training | Yr. | Degree |
| Fellowship Training   | Yr. | Degree |

**Professional Board Certifications**

Boards and Years \_\_\_\_\_

**Level of Membership**

- Full (for professionals) - \$150  
 Junior (for applicants in training, including fellowships and residencies) - \$70

**Application Instructions**

**Join online at: [www.anpaonline.org](http://www.anpaonline.org)**

Or please complete this form and **attach a copy of your current curriculum vitae.**

You may pay by check, Visa or MasterCard (please complete information below for credit card payments)

*Make all checks payable to the American Neuropsychiatric Association.*

**Send your application, CV and payment to:** ANPA, 700 Ackerman Rd, Suite 625, Columbus, OH 43202.

If you have any questions, please call 614-447-2077 or e-mail to [anpa@osu.edu](mailto:anpa@osu.edu)

Check # \_\_\_\_\_ Amount: \$ \_\_\_\_\_

Credit Card Payment:    Visa    MasterCard

Card Number: \_\_\_\_\_ Exp. Date: \_\_\_\_\_

Cardholder's Name (as on card): \_\_\_\_\_

Cardholder's Signature: \_\_\_\_\_ Amount: \$ \_\_\_\_\_

# Expand Your Knowledge with These Key Titles

## Essentials of Clinical Psychiatry, Second Edition

Edited by Robert E. Hales, M.D., M.B.A., and Stuart C. Yudofsky, M.D.

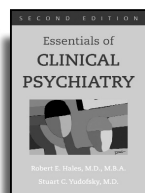

Today's busy trainees and practitioners can now turn to this economical new paperback—*Essentials of Clinical Psychiatry*, which provides a unique synopsis of the most important clinical material—20 of the original 40 chapters—from the fourth edition of the classic *The American Psychiatric Publishing Textbook of Clinical Psychiatry*.

This concise volume begins with a review of normal child and adolescent development and various psychiatric assessment tools; continues with coverage of a broad spectrum of disorders that affect infants, children, adolescents, adults, and seniors, and concludes with detailed descriptions of various treatment methods.

2004 ■ 1032 pages ■ ISBN 1-58562-033-5  
Paperback ■ \$77.00 ■ Item #62033

## Essentials of Child and Adolescent Psychiatry

Edited by Mina K. Dulcan, M.D., and Jerry M. Wiener, M.D.

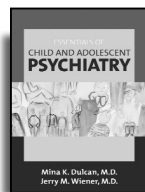

Distilling the authoritative advice found in the third edition of *The American Psychiatric Publishing Textbook of Child and Adolescent Psychiatry*, this streamlined and updated text makes that volume's detailed and comprehensive information accessible to general psychiatrists, pediatricians, neurologists, and nonphysician mental health clinicians such as nurses, psychologists, social workers, and family therapists who treat emotional and behavioral problems in the young. The *Essentials* omits the *Textbook* chapters directed primarily toward subspecialists while offering a general overview of child and adolescent psychiatric problems.

2006 ■ 720 pages ■ ISBN 1-58562-217-6 ■ Paperback  
\$85.00 ■ Item #62217

## Essentials of Clinical Psychopharmacology, Second Edition

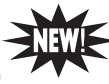

Edited by Alan F. Schatzberg, M.D., and Charles B. Nemeroff, M.D., Ph.D.

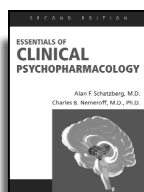

This new edition of *Essentials of Clinical Psychopharmacology* is a synopsis and update of the most clinically relevant material from *The American Psychiatric Publishing Textbook of Psychopharmacology*, Third Edition. The *Essentials* focuses on the aspects of psychopharmacology directly related to clinical care and will appeal to psychiatry residents, primary care physicians, and others interested in a concise tutorial on clinical psychopharmacology.

2006 ■ 848 pages ■ ISBN 1-58562-243-5 ■ Paperback  
\$99.00 ■ Item #62243

## Textbook of Traumatic Brain Injury

Edited by Jonathan M. Silver, M.D., Thomas W. McAllister, M.D., and Stuart C. Yudofsky, M.D.

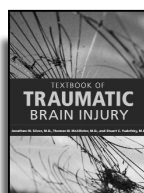

In this comprehensive textbook new chapters address structural and functional imaging, electrophysiologic techniques, neuropsychological assessment, social issues, systems of care, and treatment modalities, including alternative therapies. Expanded chapters discuss the multiple neuropsychiatric sequelae but not encompassed by the usual psychiatric syndromes, including apathy, reduced awareness of deficits, fatigue, pain, headaches, balance problems, visual difficulties, and sports injuries.

This practical, deeply informative text is a "must read" for everyone involved in the care and treatment of patients who are coping with the devastating consequences of TBI.

2005 ■ 792 pages ■ ISBN 1-58562-105-6 ■ Hardcover  
\$109.00 ■ Item #62105

## Introductory Textbook of Psychiatry, Fourth Edition

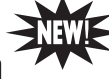

Nancy C. Andreasen, M.D., Ph.D., and Donald W. Black, M.D.

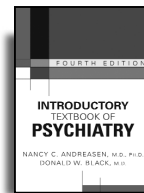

An established resource through three editions, the *Introductory Textbook of Psychiatry* has been thoroughly revised to make it more practical and easier to use, while continuing to interweave recent advances in psychiatry with the core knowledge that new students need—from grasping the neurobiology of mental illness to understanding DSM.

This user-friendly volume introduces students to a wide range of psychiatric diagnoses while providing additional coverage of special topics such as violence and suicide, legal issues, disorders of children, sleep disorders, and both psychosocial and somatic therapies. It includes a detailed introduction to the interview process, a critical review of DSM, up-to-date information on drugs, and chapters devoted to specific conditions, from cognitive disorders to impulse-control disorders. Its didactic aids include compelling case vignettes and "clinical pearls"—even more numerous in this edition—plus self-assessment questions and a glossary newly added for this edition.

"This standard textbook has always been highly accessible, readable, and user-friendly. Now updated, Andreasen and Black remains the best brief text on the market."—*Joel Paris, MD, Professor and Chair of Psychiatry, McGill University, Montreal, Canada*

2006 ■ 688 pages ■ ISBN 1-58562-223-0 ■ Hardcover  
\$78.00 ■ Item #62223

2006 ■ 688 pages ■ ISBN 1-58562-272-9 ■ Paperback  
\$58.00 ■ Item #62272

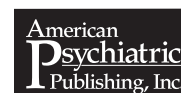

The First and Last Word in Psychiatry

1-800-368-5777 | [www.appi.org](http://www.appi.org)

Please reference priority code AH631 when ordering.



# Essential Titles in Neuropsychiatry

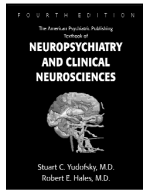

## The American Psychiatric Publishing Textbook of Neuropsychiatry and Clinical Neurosciences, Fourth Edition

Edited by **Stuart C. Yudofsky, M.D.**, and **Robert E. Hales, M.D., M.B.A.**

The fourth edition of this tremendously successful volume expands its focus on the neurosciences and covers topics such as the epidemiology and genetics of neuropsychiatric disorders, the neuropsychiatric aspects of delirium, the growth in clinical knowledge and clinical relevance of drug-induced delirium and encephalopathies other than delirium, and educational and certification issues in neuropsychiatry.

2002 • 1398 pages • ISBN 1-58562-004-1 • Hardcover • \$259.00 • Item #62004

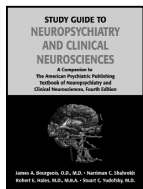

## Study Guide to Neuropsychiatry and Clinical Neurosciences

A Companion to The American Psychiatric Publishing Textbook of Neuropsychiatry and Clinical Neurosciences, Fourth Edition

**James A. Bourgeois, O.D., M.D.**, **Narriman C. Shahrokh, Robert E. Hales, M.D., M.B.A.**, and **Stuart C. Yudofsky, M.D.**

The *Study Guide* is made up of 259 questions divided into 39 individual quizzes of 5-10 questions each that correspond to chapters in *The American Psychiatric Publishing Textbook of Neuropsychiatry and Clinical Neurosciences, Fourth Edition*. Questions are followed by an Answer Guide that references relevant text (including the page number) in the *Textbook* to allow quick access to needed information. Each answer is accompanied by a discussion that addresses the correct response and also explains why other responses are not correct.

2006 • 200 pages • ISBN 1-58562-259-1 • Paperback • \$29.95 • Item #62259

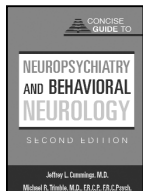

## Concise Guide to Neuropsychiatry and Behavioral Neurology, Second Edition

Edited by **Jeffrey L. Cummings, M.D.**, and **Michael R. Trimble, M.D., F.R.C.P., F.R.C.Psych.**

This popular pocket guide presents brief synopses of the major neuropsychiatric and neurobehavioral syndromes, discusses their clinical assessment, and provides guidelines for management, plus a glossary, index, and bibliographies that refer to more extensive reading.

2002 • 304 pages • ISBN 1-58562-078-5 • Paperback • \$32.95 • Item #62078

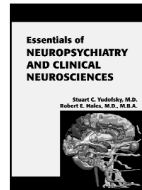

## Essentials of Neuropsychiatry and Clinical Neurosciences

Edited by **Stuart C. Yudofsky, M.D.**, and **Robert E. Hales, M.D., M.B.A.**

This book functions as a subspecialty reference that details assessment techniques and the full range of treatments available for patients with neuropsychiatric disorders. Like the tremendously successful fourth edition, this abridged version stands out because of its impressive clinical utility and practicality and because of the singular expertise of its preeminent chapter authors.

2004 • 770 pages • ISBN 1-58562-005-X • Paperback • \$79.00 • Item #62005

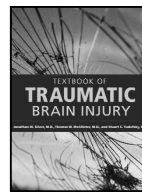

## Textbook of Traumatic Brain Injury

Edited by **Jonathan M. Silver, M.D.**, **Thomas W. McAllister, M.D.**, and **Stuart C. Yudofsky, M.D.**

Extensively updated and expanded by recognized experts, this comprehensive textbook contains 40 chapters, including 15 new for this edition, and more than 100 informative figures and illustrations. New chapters address structural and functional imaging, electrophysiologic techniques, neuropsychological assessment, social issues, systems of care, and treatment modalities, including alternative therapies. Expanded chapters discuss the multiple neuropsychiatric sequelae but not encompassed by the usual psychiatric syndromes, including apathy, reduced awareness of deficits, fatigue, pain, headaches, balance problems, visual difficulties, and sports injuries.

2005 • 792 pages • ISBN 1-58562-105-6 • Hardcover • \$109.00 • Item #62105

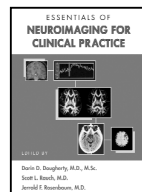

## Essentials of Neuroimaging for Clinical Practice

Edited by **Darin D. Dougherty, M.D., M.Sc.**, **Scott L. Rauch, M.D.**, and **Jerrold F. Rosenbaum, M.D.**

The use of neuroimaging in psychiatry is exploding, yet clinicians are often unclear about which studies to use to obtain the best diagnostic results in specific situations. *Essentials of Neuroimaging for Clinical Practice* demystifies the uses of these powerful techniques. An ideal clinical guide for doctors and residents, it offers clear, concise, and practical advice on how to use today's most advanced applications in the diagnostic workup of patients. In addition, it explores implications of each modality for future practice and research.

2004 • 162 pages • ISBN 1-58562-079-3 • Hardcover • \$52.00 • Item #62079

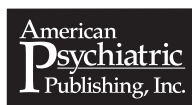

1-800-368-5777 | [www.appi.org](http://www.appi.org) Please reference priority code AH618 when ordering.

# journals.psychiatryonline.org

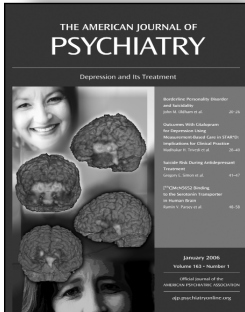

## The American Journal of Psychiatry

Official Journal of the American Psychiatric Association  
**Editor: Robert Freedman, M.D.**

2006 • Volume 163, 12 issues  
 Print: ISSN 0002-953X • Electronic: ISSN 1535-7228

| Individual Subscriptions — Print & Electronic |        |              |        |
|-----------------------------------------------|--------|--------------|--------|
| U.S.                                          | Item # | Outside U.S. | Item # |
| \$193.00                                      | AJPPDN | \$290.00     | AJPPIN |

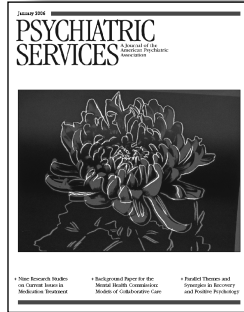

## Psychiatric Services

A Journal of the American Psychiatric Association  
**Editor: Howard H. Goldman, M.D., Ph.D.**

2006 • Volume 57, 12 issues • ISSN 1075-2730

| Individual Subscriptions — Print & Electronic |        |              |        |
|-----------------------------------------------|--------|--------------|--------|
| U.S.                                          | Item # | Outside U.S. | Item # |
| \$91.00                                       | PSYPDN | \$184.00     | PSYPIN |

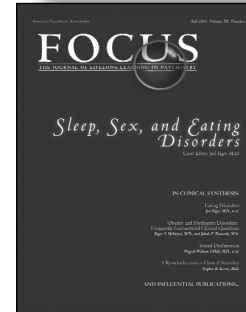

## FOCUS

The Journal of Lifelong Learning in Psychiatry  
**Editors: Deborah Hales, M.D., and Mark Hyman Rapaport, M.D.**

2006 • Volume 4, 4 issues •  
 Print: ISSN 1541-4094 • Electronic: ISSN 1541-4108

| APA Member Individual Subscriptions |        |              |        |
|-------------------------------------|--------|--------------|--------|
| U.S.                                | Item # | Outside U.S. | Item # |
| \$249.00                            | FOCPDM | \$313.00     | FOCPIN |
| Nonmember Subscriptions             |        |              |        |
| \$399.00                            | FOCPDN | \$464.00     | FOCPIN |

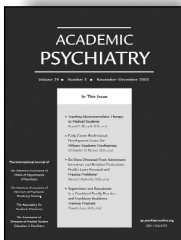

## Academic Psychiatry

The Journal of the American Association of Chairs of Departments of Psychiatry, the American Association of Directors of Psychiatric Residency Training, the Association for Academic Psychiatry, and the Association of Directors of Medical Student Education in Psychiatry

**Editor: Laura Roberts, M.D.**

2006 • Volume 30, 5 issues  
 Print: ISSN 1042-9670 • Electronic: ISSN 1545-7230

| Individual Subscriptions — Print & Electronic |        |              |        |
|-----------------------------------------------|--------|--------------|--------|
| U.S.                                          | Item # | Outside U.S. | Item # |
| \$176.00                                      | ACAPDN | \$214.00     | ACAPIN |

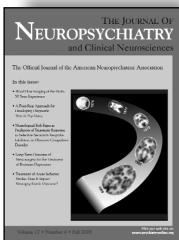

## The Journal of Neuropsychiatry and Clinical Neurosciences

The Official Journal of the American Neuropsychiatric Association  
**Editor: Stuart C. Yudofsky, M.D., Deputy Editor: Robert E. Hales, M.D., M.B.A.**

2006 • Volume 18, 4 issues  
 Print: ISSN 0895-0172 • Electronic: ISSN 1545-7222

| Individual Subscriptions — Print & Electronic |        |              |        |
|-----------------------------------------------|--------|--------------|--------|
| U.S.                                          | Item # | Outside U.S. | Item # |
| \$165.00                                      | JNPPDN | \$194.00     | JNPPIN |

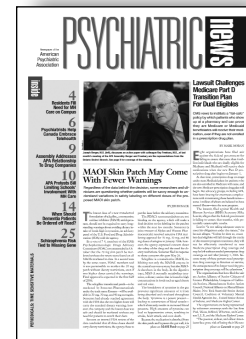

## Psychiatric News

Newspaper of the American Psychiatric Association  
**Editor-in-Chief: James P. Krajeski, M.D.**

2006 • Volume 41, 24 issues • ISSN 0033-2704

| Individual Subscriptions — Print & Electronic |        |              |        |
|-----------------------------------------------|--------|--------------|--------|
| U.S.                                          | Item # | Outside U.S. | Item # |
| \$88.00                                       | NEWPDN | \$158.00     | NEWPIN |

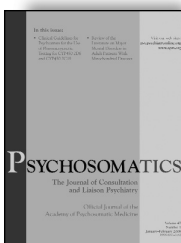

## Psychosomatics

The Journal of Consultation-Liaison Psychiatry  
 Official Journal of the Academy of Psychosomatic Medicine  
**Editor: Thomas N. Wise, M.D., Associate Editor: Richard C. W. Hall, M.D.**

2006 • Volume 47, 6 issues  
 Print: ISSN 0033-3182 • Electronic: ISSN 1545-7206

| Individual Subscriptions — Print & Electronic |        |              |        |
|-----------------------------------------------|--------|--------------|--------|
| U.S.                                          | Item # | Outside U.S. | Item # |
| \$175.00                                      | SOMPDN | \$208.00     | SOMPIN |

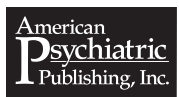

## The First and Last Word in Psychiatry

1000 Wilson Boulevard, Suite 1825  
 Arlington, VA 22209-3901  
 Phone: 1-800-368-5777 | 703-907-7322  
 Fax: 703-907-1091  
 E-mail: [appi@psych.org](mailto:appi@psych.org)  
 Web: [www.appi.org](http://www.appi.org) or [www.psychiatryonline.org](http://www.psychiatryonline.org)

Please reference Priority Code AH619 when ordering.

Institutional Pricing: please call 703-907-8538  
 or email: [institutions@psych.org](mailto:institutions@psych.org)

# Advance your connections online and onsite at the APA Annual Meeting.

## EXPAND YOUR REACH

Now is the time to find the best fit for your psychiatric position. Meet talented candidates and access all the information you need to make a smart placement decision at the APA Annual Meeting in Toronto, Canada, May 20-25, 2006.

Before the meeting, post your psychiatric position online at [www.psych.org/jobbank](http://www.psych.org/jobbank). At the meeting and online, you may tap into the Job Bank's many resources. Use our new Conference Tool to coordinate face-to-face meetings with candidates attending the event.

## STRENGTHEN YOUR RECRUITMENT EFFORTS

Advertise your psychiatric opportunity in APA's *Psychiatric News* and *Psychiatric Services* classifieds and the APA Job Bank online and receive a 10% discount on your total recruitment package. For more information, contact Joel Nepomuceno at 703-907-7330 or email [classads@psych.org](mailto:classads@psych.org).

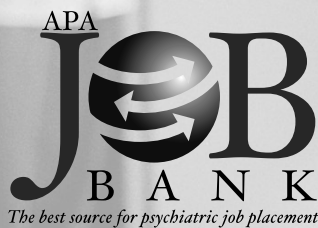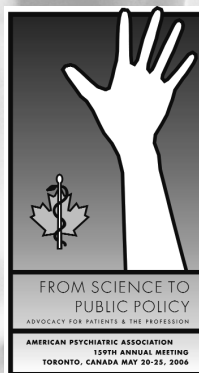

Visit [www.psych.org/jobbank](http://www.psych.org/jobbank) today!  
Your best source for psychiatric job placement.

# Psychiatry 1844 1997 Legacy Collection

- \* Available for purchase Spring 2006; one-time fee buys access to entire collection in perpetuity
- \* Dates back to 1844 and includes *The American Journal of Psychiatry*, the oldest continuously published medical specialty journal in the United States
- \* Completes your current collection with content going back to Volume I, Issue I
- \* Fully searchable; high-resolution scanning of original printed pages ensures easy online reading and printing

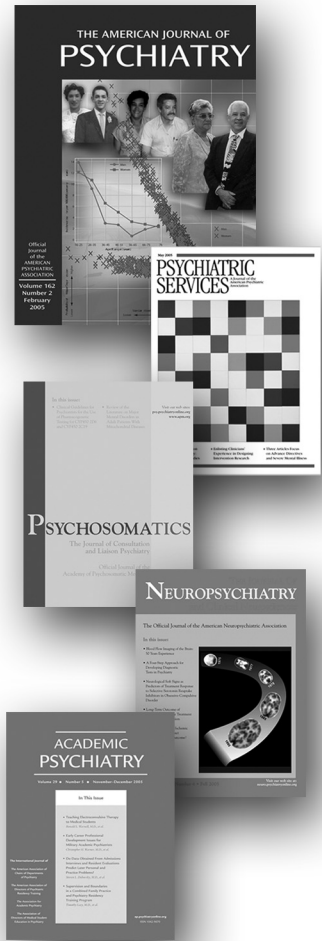

“As psychiatrists know better than perhaps any other medical specialty, studying the past is the best way to understand the present and to change the future.”

– Nancy C. Andreasen, M.D., Ph.D.  
Past Editor, AJP

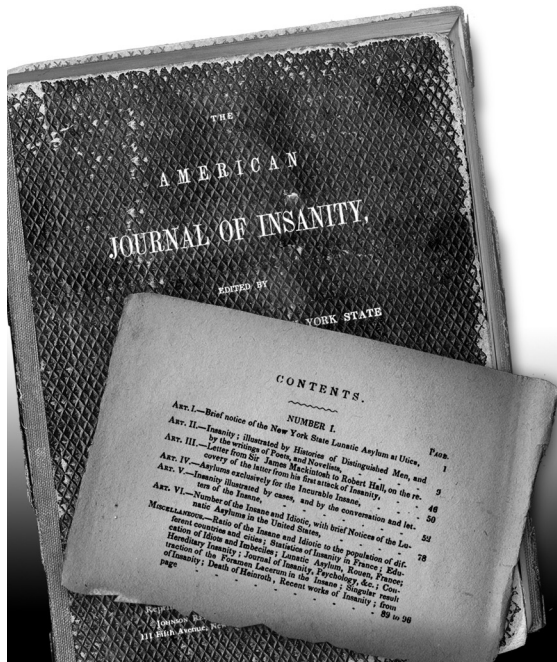

| Psychiatry Legacy Collection Journals                                                                                                                                 | Volumes Included | Years Covered |
|-----------------------------------------------------------------------------------------------------------------------------------------------------------------------|------------------|---------------|
| <b>The American Journal of Psychiatry</b>                                                                                                                             | 1–153            | 1844–1996     |
| Volumes 1 (1844) thru 77 (1921) published as <i>The American Journal of Insanity</i>                                                                                  |                  |               |
| <b>Academic Psychiatry</b>                                                                                                                                            | 13–21            | 1989–1997     |
| NOT INCLUDED: Volumes 1 thru 12 (1988) published as <i>Journal of Psychiatric Education</i> and owned by another publisher                                            |                  |               |
| <b>Journal of Neuropsychiatry &amp; Clinical Neurosciences</b>                                                                                                        | 1–9              | 1989–1997     |
| <b>Journal of Psychotherapy Practice and Research</b>                                                                                                                 | 1–6              | 1992–1997     |
| <b>Psychiatric Services</b>                                                                                                                                           | 1–48             | 1950–1997     |
| Volumes 1 (1950) through 15 (1964) published as <i>Mental Hospitals</i> ; Volumes 16 (1965) through 45 (1994) published as <i>Hospital &amp; Community Psychiatry</i> |                  |               |
| <b>Psychosomatics</b>                                                                                                                                                 | 1–38             | 1960–1997     |

For more information or a price quote for your institution  
call 800-368-5777 ext. 8538 or 703-907-8538  
or email [institutions@psych.org](mailto:institutions@psych.org)

AH623

We've taken the psychiatric resources you use every day and put them online

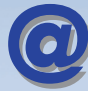

PsychiatryOnline.com

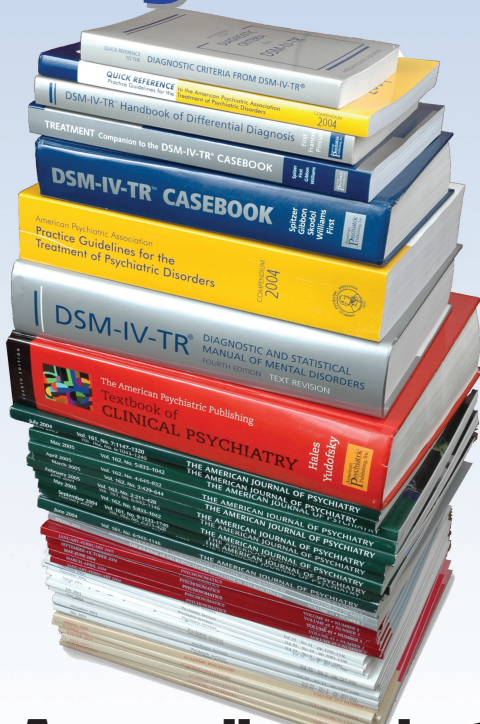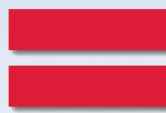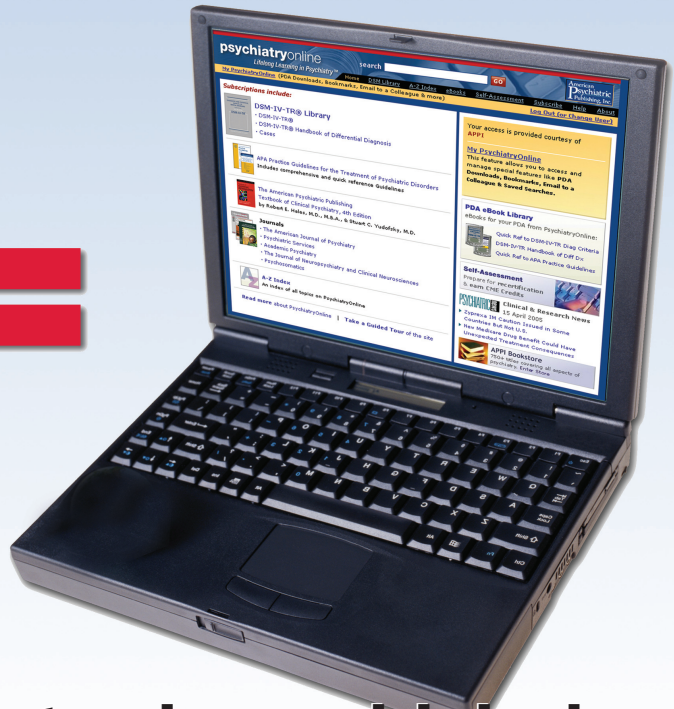

Access diagnosis, treatment, and research in books and journals—all from one website with a single search interface—accessible anytime, anywhere.

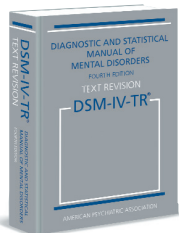

Whether your needs are clinical, academic, or administrative, **PsychiatryOnline.com** provides access to the information critical to your work and everyday psychiatric practice.

“ *PsychiatryOnline* is incredible! I can easily refer to it for diagnostic criteria, treatment guidelines, or simply to review the latest journal articles. It's the easiest, quickest, and most intuitive way to access psychiatric information. I get more work done in less time, and the quality of my work has improved. I would encourage all psychiatrists to get it. I would even go so far as to say that **PsychiatryOnline.com** will serve to strengthen the psychiatric profession and help keep psychiatrists in the forefront of mental health diagnosis, treatment, and research. ”

— Scott Monteith, M.D., Traverse City, Michigan

For more information on **PsychiatryOnline.com** or to subscribe today, visit **www.PsychiatryOnline.com**. Please use priority code AH601.

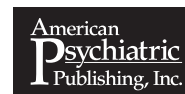

The First and Last Word in Psychiatry
