# THE JOURNAL OF NEUROPSYCHIATRY and Clinical Neurosciences

The Official Journal of the American Neuropsychiatric Association

## In this issue:

- Behavioral Neurology & Neuropsychiatry Is a Subspecialty
- Regional Alpha-Synuclein Aggregation, Dopaminergic Dysregulation, and the Development of Drug-Related Visual Hallucinations in Parkinson's Disease
- Dementia With Mood Symptoms in a Fragile X Premutation Carrier With the Fragile X-Associated Tremor/Ataxia Syndrome: Clinical Intervention With Donepezil and Venlafaxine
- Donepezil Effects on Cerebral Blood Flow in Older Adults With Mild Cognitive Deficits

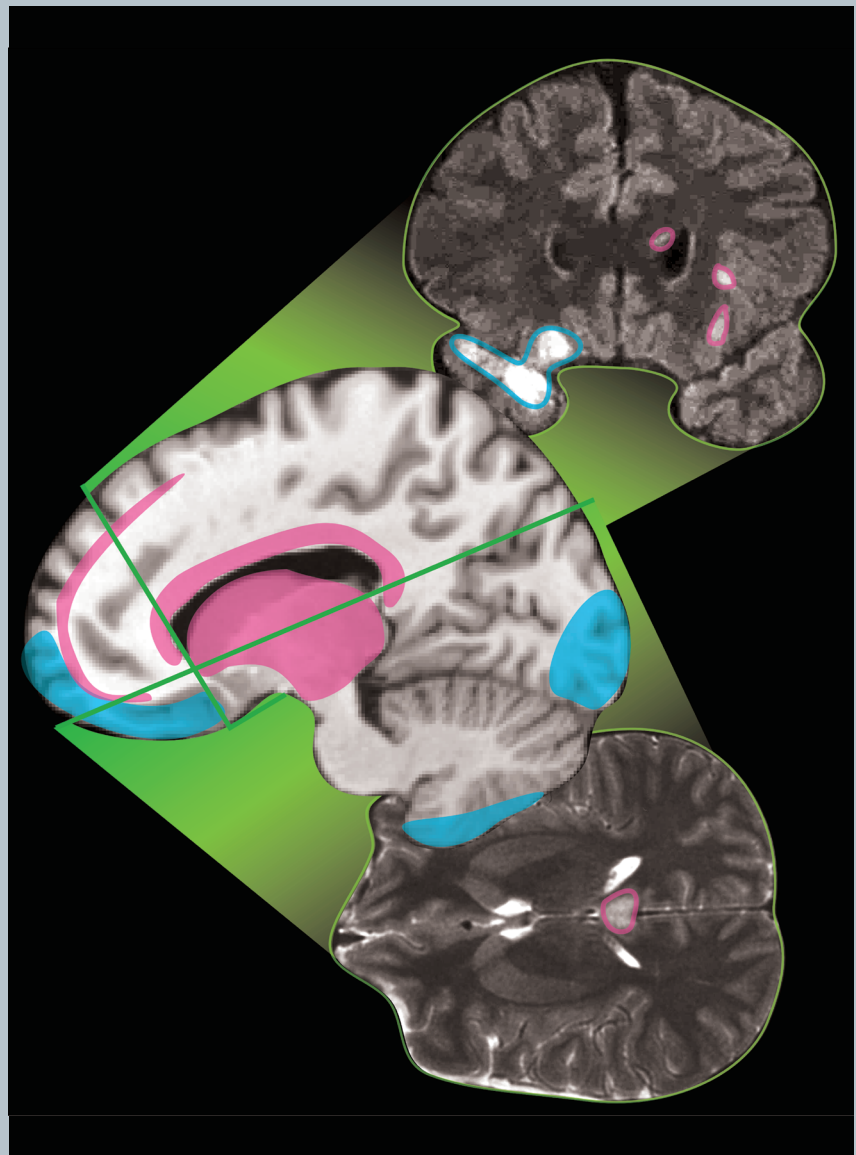

Source: https://neuro.psychiatryonline.org/doi/suppl/10.1176/jnp.2006.18.issue-2/suppl_file/cover.pdf
